1 **Asymmetric inheritance of centrosomes maintains stem cell**  
2 **properties in human neural progenitor cells**

3

4 Lars N. Royall<sup>1</sup>, Annina Denoth-Lippuner<sup>1</sup>, Sebastian Jessberger<sup>1\*</sup>

5

6 <sup>1</sup>Laboratory of Neural Plasticity, Faculties of Medicine and Science, Brain Research Institute,  
7 University of Zurich, 8057 Zurich, Switzerland. \*Correspondence should be addressed to S.J.  
8 (jessberger@hifo.uzh.ch)

9

10

11

12

13

14

15

16

17

18 **Impact Statement**

19 Genetic birthdating in forebrain organoids shows asymmetric inheritance of  
20 centrosomes in human neural progenitor cells, required for proper human  
21 neurogenesis.

22

23 **Keywords**

24 Neurogenesis, centrosome, asymmetric cell division, organoid, human neural  
25 progenitor cell

26

## 27 **Abstract**

28 During human forebrain development, neural progenitor cells (NPCs) in the  
29 ventricular zone (VZ) undergo asymmetric cell divisions to produce a self-renewed  
30 progenitor cell, maintaining the potential to go through additional rounds of cell  
31 divisions, and differentiating daughter cells, populating the developing cortex.  
32 Previous work in the embryonic rodent brain suggested that the preferential  
33 inheritance of the pre-existing (older) centrosome to the self-renewed progenitor cell  
34 is required to maintain stem cell properties, ensuring proper neurogenesis. If  
35 asymmetric segregation of centrosomes occurs in NPCs of the developing human  
36 brain, which depends on unique molecular regulators and species-specific cellular  
37 composition, remains unknown. Using a novel, recombination-induced tag exchange  
38 (RITE)-based genetic tool to birthdate and track the segregation of centrosomes over  
39 multiple cell divisions in human embryonic stem cell (hESC)-derived regionalized  
40 forebrain organoids, we show the preferential inheritance of the older mother  
41 centrosome towards self-renewed NPCs. Aberration of asymmetric segregation of  
42 centrosomes by genetic manipulation of the centrosomal, microtubule-associated  
43 protein Ninein alters fate decisions of NPCs and their maintenance in the VZ of  
44 human cortical organoids. Thus, the data described here use a novel genetic  
45 approach to birthdate centrosomes in human cells and identify asymmetric  
46 inheritance of centrosomes as a mechanism to maintain self-renewal properties and  
47 to ensure proper neurogenesis in human NPCs.

48

49

## 50 **Introduction**

51 During human brain development, neural progenitor cells (NPCs) undergo two  
52 modes of cell division. At first, NPCs, at this developmental stage called  
53 neuroepithelial cells, undergo expansive symmetric divisions (Cadwell et al., 2019;  
54 Libe-Philippot and Vanderhaeghen, 2021). Symmetric divisions are characterised by  
55 the generation of two daughter cells of similar fate; here, two NPCs both retain their  
56 potency, their capacity to self-renew and remain in the ventricular zone (VZ). Around  
57 gestational week (GW) 5 in the developing human brain (corresponding  
58 approximately to embryonic day (E) 11.5 in the mouse embryo), NPCs, at this  
59 developmental stage referred to as radial glia or apical progenitor cells, transition  
60 from an expansive phase into a neurogenic phase and shift their mode of division  
61 from symmetric to asymmetric divisions (Cadwell et al., 2019; Libe-Philippot and  
62 Vanderhaeghen, 2021). Asymmetric divisions result in two daughter cells with  
63 different fates and cellular behaviour: one daughter remains in the VZ and retains the  
64 ability to self-renew, comparable to the mother cell. The other daughter cell migrates  
65 along the basal process of their sister cell, out of the VZ and either directly begins  
66 the process of neuronal differentiation or initiates additional rounds of symmetric,  
67 differentiating cell divisions producing two neurons (at this stage referred to as  
68 intermediate progenitors or basal progenitor cells) (Noctor et al., 2004; Hansen et al.,  
69 2010; Gao et al., 2014). Exactly how differential fates of sister cells are established  
70 remains not completely elucidated; however, previous work showed that the  
71 centrosome might play a central role in distinct fates of daughter cells upon  
72 neurogenic, asymmetric cell divisions (Wang et al., 2009).

73       Centrosomes are unbound organelles comprised of two centrioles connected  
74 by a flexible linker and surrounded by a dynamic protein matrix called pericentriolar

75 material. Centrosomes are the primary microtubule organising centres of metazoan  
76 cells and provide the contractile forces required for mitosis in most human cells  
77 (Bornens, 2002). The centrosome duplicates once per cell cycle that occurs in a  
78 semi-conservative way, producing one centrosome that is older and functionally  
79 more mature than the other one. At mitosis, the older and younger centrosome will  
80 always be asymmetrically segregated to one of the two daughter cells. Previous  
81 work showed that there is non-random inheritance of centrosomes based on their  
82 age in the developing cortex of flies (Januschke et al., 2011; Ranjan et al., 2019;  
83 Sunchu and Cabernard, 2020), chickens (Tozer et al., 2017) and mice (Wang et al.,  
84 2009; Paridaen et al., 2013). Indeed, in the mouse developing cortex self-renewing  
85 NPCs appear to inherit the older, more mature centrosome while the newborn  
86 neuron inherits the new, daughter centrosome (Wang et al., 2009). Notably,  
87 randomization of centrosome inheritance leads to premature depletion of NPCs from  
88 the VZ, indicating functional relevance of asymmetric centrosome inheritance during  
89 mouse cortical development (Wang et al., 2009). How asymmetric centrosome  
90 inheritance affects cellular fate is only poorly understood but, for example, recent  
91 work showed that Mind-bomb1, a Notch signalling regulator, is preferentially  
92 enriched at the younger centrosome, asymmetrically segregates with it into the  
93 differentiating daughter cell, and thereby potentially promotes stemness via Notch  
94 signalling activation in surrounding NPCs (Tozer et al., 2017).

95 Despite substantial evidence supporting the importance of asymmetric  
96 centrosome inheritance in NPCs from diverse, evolutionary distant species, there is  
97 little known about human tissues. This is mainly due to the difficulty obtaining  
98 samples of human developing cortex coupled with the fact that asymmetric divisions  
99 are rarely, if not ever, seen *in vitro* in 2-dimensional (2D) cell cultures. However, it is

100 clear that the human gyrencephalic brain relies on species-specific molecular  
101 regulators and shows a substantially distinct cellular composition compared to the  
102 lissencephalic rodent brain. For example, the human developing brain harbours  
103 asymmetrically dividing NPCs in the outer subventricular zone, referred to as basal  
104 radial glia, which are rare in the developing cortex of lissencephalic animals (Hansen  
105 et al., 2010; Ostrem et al., 2017; Llinares-Benadero and Borrell, 2019). Recent  
106 methodological advances such as the generation of brain organoids, derived from  
107 human pluripotent stem cells, recapitulate early steps of human brain development,  
108 allowing for novel approaches to characterize the principles of cortical development  
109 in human tissues (Lancaster et al., 2013; Di Lullo and Kriegstein, 2017). Here, we  
110 used human embryonic stem cell (hESC)-derived, regionalized forebrain organoids  
111 as a model of early human cortical development to identify the dynamics and  
112 functional relevance of asymmetric centrosome inheritance for human neurogenesis.

113

## 114 **Results**

### 115 *Centriolin-RITE birthdates human centrosomes*

116 With the aim to birthdate and track the segregation of centrosomes over multiple cell  
117 divisions in human cells we created a novel genetic tool based on the recombination-  
118 induced tag exchange (RITE) system (Hotz et al., 2012), consisting of the red  
119 fluorescent protein tdTomato flanked by LoxP sites and followed by a second section  
120 containing the green fluorescent protein NeonGreen (with each section ending with a  
121 terminal stop codon followed by a 3'UTR or a T2A Neo respectively) (Figure 1A).  
122 Using CRISPR/Cas9 (Ran et al., 2013) we inserted the RITE construct into hESCs  
123 immediately upstream of the terminal stop codon of Centriolin, a protein that  
124 localises to the subdistal appendages of the mother centriole (Gromley et al., 2003;  
125 Gromley et al., 2005; Kashihara et al., 2019; Chong et al., 2020). The Centriolin  
126 yeast ortholog, Nud1, has previously been shown to have limited turnover on the  
127 pre-existing yeast spindle pole body (Lengefeld et al., 2017). As the reading frame is  
128 maintained, Centriolin will be constitutively tagged with tdTomato. LoxP  
129 recombination with Cre recombinase will excise the first section containing tdTomato,  
130 causing Centriolin to be tagged with NeonGreen, and allowing for the discrimination  
131 of pre-existing vs. newly synthesized Centriolin based on red vs. green fluorescence.  
132 Indeed, tdTomato positive dots were observed in each cell and NeonGreen was  
133 detectable within 24 hours after recombination induced by electroporation of Cre  
134 recombinase expressing plasmid; staining with the centrosomal marker protein  
135 Pericentrin showed that Centriolin-tdTomato was properly localising to the  
136 centrosome (Figure 1B). Correct localization of RITE-tagged Centriolin was  
137 confirmed by live imaging of hESCs following electroporation of GFP-Centrin-1,  
138 which localised to the centrioles (Supplementary Figure 1A). In line with the known

139 behaviour of Centriolin as a subdistal appendage of the mother centriole, Centriolin-  
140 tdTomato co-localised to one of the two centrioles.

141 Examination of cells at different stages of mitosis showed that Centriolin-  
142 tdTomato signal was present in prophase cells but diminished by metaphase (Figure  
143 1C). To investigate whether this was due to loss of Centriolin-tdTomato protein or  
144 quenching of fluorescence, we stained for tdTomato, which revealed that Centriolin-  
145 tdTomato protein remained localised to the centrosome throughout mitosis (Figure  
146 1D), indicating that RITE-tagged Centriolin allows for tracking centrosomes in human  
147 cells. To simplify and facilitate Cre recombinase-mediated recombination without the  
148 need of transfection or electroporation we used CRISPR/Cas9 to introduce a stable  
149 expression cassette of ER<sup>T2</sup>-CRE-ER<sup>T2</sup> from the human *safe harbour* locus Adeno-  
150 associated virus site 1 (AAVS1; Roemer, 2016), which we used for subsequent  
151 experiments.

152

### 153 *Centriolin-RITE localisation and recombination in human forebrain organoids*

154 We used a heterozygous Centriolin-RITE, ER<sup>T2</sup>-CRE-ER<sup>T2</sup> positive hESC line to  
155 generate regionalized, forebrain organoids (Supplementary Figure 1B) to understand  
156 how centriolin localises within the 3-dimensional structure of human neural tissues  
157 (Qian et al., 2016; Denoth-Lippuner et al., 2021). Day 35 organoids were fixed and  
158 stained with the centrosomal marker CEP164 to check for correct colocalization of  
159 RITE-tagged Centriolin within organoids. Indeed, CEP164 co-staining confirmed co-  
160 localization with Centriolin-tdTomato (Figure 2A). Ventricle-like structures at the  
161 center of cortical units were easily identifiable by the clustering of Centriolin-

162 tdTomato-labeled centrosomes, belonging to SOX2-positive, NPCs in the VZ (Figure  
163 2A). Centrosomes outside of the VZ were more sparsely distributed.

164 To test whether Centriolin-RITE organoids maintain their capacity to  
165 recombine, day 35 organoids were incubated with 4-OH tamoxifen to induce nuclear  
166 translocation of the ER<sup>T2</sup>-Cre-ER<sup>T2</sup> and thus the recombination of the LoxP sites in  
167 the RITE system. Presence of Centriolin-NeonGreen was detected both inside and  
168 outside the ventricle, indicating successful recombination (Figure 2B). Interestingly,  
169 we observed centrosomes with varying NeonGreen-to-tdTomato ratios, indicating  
170 centrosomes of varied ages. Such mixed tdTomato and NeonGreen centrosomes  
171 were observed at longer time points (>20 days) after recombination indicating that  
172 centriolin was remarkably stable on the centrosome, labeled with CEP164.

173

#### 174 *Ventricular NPCs retain the older centrosome*

175 To assess whether there is an asymmetric inheritance of older centrosomes, the  
176 RITE-tagged centrosome signal was compared between NPCs in the VZ and  
177 progeny that had migrated away from the center of cortical units. NPCs in VZ were  
178 selected for comparison, as opposed to all SOX2-positive cells, as their presence in  
179 the VZ strongly indicates their capacity for self-renewal whereas SOX2-positive cells  
180 outside of the VZ may have already started differentiation along the neural lineage.

181 Twenty-two days after recombination organoids were stained and the  
182 ventricles, and the surrounding tissue, were imaged (Figure 2C). During this process,  
183 the 3-D tissue gets collapsed into a 2-D image. As ventricle-like structures in  
184 organoids are tubular or spherical in nature, this dimension collapse produces a  
185 circle of centrosomes, where multiple Z planes show a ring (Figure 2D and



186 Supplementary Figure 1C). This leads to an inclusion of centrosomes whose cell  
187 bodies are not imaged because of the radial orientation of NPCs relative to the  
188 ventricles and the volume of tissue imaged. This is problematic as the progeny of the  
189 recombined NPCs whose centrosomes are on the inner ventricular wall (shown in  
190 purple in Figure 2D) would migrate along the NPCs' radial projection and would not  
191 be in the imaged area. However, NPCs whose centrosomes are on the outer  
192 ventricular wall will produce progeny that should remain in the imaged area (shown  
193 in orange and yellow in Figure 2D). The inclusion of NPC centrosomes and not their  
194 progeny could potentially skew the data. To correct for this, images were digitally  
195 subdivided into areas of recombined NPCs and their likely progeny (Figure 2E).  
196 Centrosomes were manually allocated a colour by the quantity of Centriolin-  
197 tdTomato signal present in recombined centrosomes. Orange centrosomes'  
198 tdTomato signals were visibly indistinguishable from non-recombined centrosomes  
199 (Figure 2F); yellow centrosomes had some tdTomato signal but less compared to  
200 non-recombined centrosomes and green centrosomes showed no detectable  
201 tdTomato signal. The number of orange, yellow and green centrosomes were  
202 counted in the VZ section (vent) and the non-VZ section (nonvent) and compared.  
203 Comparison between these two regions revealed a higher proportion of orange  
204 centrosomes in the ventricle compared to outside the ventricle (Figure 2G-H,  
205 Supplementary Table 1). The inverse was observed for green centrosomes, whereas  
206 there was no difference seen in the localisation of yellow centrosomes, similar to  
207 what was observed in the absolute number of each centrosome colour (Figure 2H).  
208 To validate the manual approach, we used an unbiased method of analysing  
209 fluorescence levels at the centrosomes. The mean tdTomato and NeonGreen signal  
210 was acquired, and a ratio was calculated for each centrosome (see Methods for

211 details). This analysis showed that VZ centrosomes had a lower proportion of  
212 NeonGreen signal compared to their non-ventricular progeny (Supplementary Figure  
213 1D, Supplementary Table 4), corroborating the previous results obtained by manual  
214 grading. Next, centrosomes were divided into thirds by their NeonGreen to total  
215 signal ratio, with the highest, middle, and lowest thirds being labelled “green”, “yellow”  
216 and “orange” respectively. Again, we found increased orange centrosomes in the VZ  
217 and more green centrosomes in the non-ventricle areas within organoids  
218 (Supplementary Figure 1E-F, Supplementary Table 5). Taken together, these data  
219 indicate that the older, tdTomato-enriched centrosomes are preferentially retained by  
220 VZ NPCs, whereas the differentiating progeny inherits the younger, more  
221 NeonGreen-containing centrosomes.

222

### 223 *Ninein knockdown affects NPC fate*

224 Next, we wanted to understand how centrosome inheritance affects the behaviour of  
225 human NPCs. Previous work identified that a knockdown of Ninein can randomise  
226 inheritance by preventing centriole maturation, without impeding the cells’ ability to  
227 divide (Wang et al., 2009). We produced constructs that expressed human Ninein  
228 targeting shRNA or a scrambled shRNA under the U6 promoter, as well as an H2B-  
229 CFP to facilitate identification of targeted cells (Supplementary Figure 2A). To test  
230 the efficacy of the shRNA, we transfected HEK cells with the constructs and stained  
231 them for Ninein as well as centrosomal marker Pericentrin (Supplementary Figure  
232 2C, Supplementary Table 6). Analysis of the intensity of the Ninein signal showed a  
233 significant decrease between scrambled and Ninein-targeting shRNAs  
234 (Supplementary Figure 2D). Ninein-targeting and control shRNA-expressing  
235 constructs were then electroporated into the VZ of day 35 WT human forebrain

236 organoids (Figure 3A). After 5 days, we assessed the cell types of shRNA- targeted  
237 cells by co-staining with SOX2 or CTIP2 (Figure 3B-D, Supplementary Table 2).  
238 Strikingly, we found a decrease in the proportion of SOX2-positive cells upon Ninein  
239 knockdown, which corresponded with a significant increase in the neuronal, CTIP2-  
240 positive population. These data suggest that knockdown of Ninein, and therefore  
241 possibly randomization of centrosome inheritance, leads to precocious neuronal  
242 differentiation of NPCs in the ventricular zone (Figure 3B-D).

243

#### 244 *Ninein knockdown alters centrosome segregation*

245 As Ninein knockdown caused an increase in CTIP2-positive neurons, we next  
246 analyzed whether the older centrosome was still retained in the VZ or if it was also  
247 inherited by the differentiating daughter cell. To ensure constitutive expression of  
248 shRNA and recombination of only the cells expressing the shRNA, we generated  
249 constructs that expressed CRE-ER<sup>T2</sup> and the shRNA (Supplementary Figure 2B) on  
250 a retroviral backbone. Day 24 organoids derived from Centriolin-RITE (CRE-ER<sup>T2</sup>  
251 negative) hESCs were transduced with either scrambled or Ninein-targeting shRNA  
252 retroviruses (Figure 4A). Organoids were induced with 4-OH tamoxifen, fixed 22  
253 days later and their centrosomes colours were manually analysed (Figure 4B).  
254 Remarkably, we observed a shift in the localisation of the old centrosomes in the  
255 Ninein knockdown condition as compared to the scrambled, with an increase in old  
256 (orange) and a decrease in young (green) non-ventricular centrosomes in the Ninein  
257 knockdown cells as compared to the scrambled condition (Figure 4C-D,  
258 Supplementary Table 3). This corresponded with the reverse seen in younger  
259 (green) centrosomes, where Ninein knockdown caused a substantial increase in  
260 green centrosomes in ventricular regions (Figure 4C-D). Taken together, these data

261 suggest that Ninein plays a role in the inheritance of the older centrosome in the  
262 cells of the VZ and that aberration of Ninein, here through shRNA mediated  
263 knockdown, leads to segregation of the older centrosome also into non-ventricular  
264 areas, associated with impaired NPC behaviour.

265

## 266 **Discussion**

267

268 We here identify asymmetric inheritance of the older and more mature centrosome  
269 by ventricular NPCs in a model of the developing human cortex, which has hitherto  
270 not been described in human tissues. Such non-random and preferential inheritance  
271 of one of the centrosomes depending on centrosomal age by one of the two  
272 daughter cells has previously been reported for asymmetric cell divisions in yeast,  
273 drosophila, and mice. The evolutionary conservation of this phenomenon  
274 emphasises the important role that centrosome inheritance may play in maintaining  
275 the proper cellular behaviour during asymmetric cell division.

276         The reason why human ventricular NPCs retain the older mother centrosome  
277 remains unclear. Several hypotheses may explain preferential inheritance of the old  
278 centrosome to the self-renewed daughter NPC. One potential reason could be that  
279 inheritance of the old centrosome may reduce aberrant mitotic events as the mother  
280 centrosome had participated previously in at least one successful mitosis,  
281 suggesting that the centrosome is capable of producing a daughter centriole,  
282 nucleating microtubules, and facilitating normal chromosome segregation, while the  
283 newly synthesized daughter centrosome is newer and less “tested” as it has never  
284 produced a functional centrosome. If this centrosome has an aberration in its  
285 structure, it could lead to duplication defects and deleterious chromosomal  
286 missegregation. Thus, one may hypothesize that evolution would favour retaining the  
287 older, tested centrosome with the daughter cell that must undergo additional rounds  
288 of cell divisions. In support of this notion, the older centrosome is inherited by self-  
289 renewing NPCs in mouse (Wang et al., 2009) and, as we here show, in human  
290 cortical development, and by the daughter cell in budding yeast (Pereira et al., 2001;

291 Lengefeld et al., 2017), which is considered the stem cell. In contrast, drosophila  
292 neuroblasts inherit the younger centrosome and pass on the older centrosome to  
293 their differentiating daughter cells (Januschke et al., 2011). Why drosophila  
294 neuroblasts do not follow the mode of centrosome inheritance observed in other  
295 species is not known. One may speculate that drosophila neuroblasts produce less  
296 progeny and therefore have lower selective pressure to maintain their fitness.

297 Another potential reason for asymmetric inheritance could be that the old  
298 centrosome of NPCs is maintained on the ventricular wall associated with the  
299 primary cilium. Indeed, it has been shown that the mother centrosome is quicker to  
300 reassemble the primary cilium, likely because it was already decorated with the distal  
301 appendages from the previous interphase (Paridaen et al., 2013), which has been  
302 shown to be critical for NPC cellular behaviour. Moreover, at the ventricular wall,  
303 space is limited, and the apical feet of ventricular NPCs are crowded together  
304 forming adherens junctions. The stability of these junctions and the maintenance of  
305 the apical foot itself is dependent on the junctional microtubules (Kasioulis et al.,  
306 2017), which can be destabilised by increased centrosomal microtubule  
307 organisational activity (Camargo Ortega et al., 2019). Indeed, previous work showed  
308 that overexpression of the centrosomal protein AKNA increased centrosomal  
309 microtubule organisational activity, destabilised the apical junction, and caused  
310 NPCs to delaminate from the apical surface and migrate out of the VZ. Furthermore,  
311 the mother centrosome was shown to anchor to the apical membrane via the distal  
312 appendage protein CEP83 (Shao et al., 2020). Loss of CEP83 causes impaired  
313 apical anchorage of the centrosome, disorganisation of microtubules, increase in  
314 NPC proliferation and subsequent enlargement of the cortex. These data indicate  
315 that the maintenance of NPCs in the ventricular zone requires a delicate balance of

316 centrosomal function at the apical surface. Inheritance of the older centrosome could  
317 be one mechanism by which NPCs regulate this balance. Removing Ninein from the  
318 centrosome could alter this balance and lead to the older centrosome being inherited  
319 to a non-ventricle destined cell. Additionally, it is becoming apparent that  
320 centrosomes act as one of the key signalling centres of the cell (Arquint et al., 2014).  
321 The Notch signalling regulator, Mind-bomb1, was shown to be preferentially enriched  
322 on the daughter centrosome and asymmetrically segregated with it into the  
323 differentiating daughter cell (Tozer et al., 2017). Mind-bomb1 in this cell would then  
324 promote stemness via Notch signalling activation in the surrounding NPCs.  
325 Consistent retention of particular centrosome allows of such asymmetric signalling  
326 pathways to be established and could facilitate the coordination of other cellular  
327 asymmetries (Royall and Jessberger, 2021).

328         The extent to which proper asymmetric inheritance of the older centrosome by  
329 dividing NPCs is associated with human disease remains currently unknown. For  
330 example, disturbance of asymmetric inheritance of centrosomes could play a  
331 causative role in microcephaly where indeed a substantial number of human variants  
332 and mutations have been identified in genes associated with centrosome function  
333 and structure (Faheem et al., 2015). Strikingly, a recent cell type-specific analysis of  
334 centrosomal proteomes identified a large number of proteins, previously implicated  
335 with neurodevelopmental disease, to be associated with centrosomes (O'Neill et al.,  
336 2022). We here identify that human NPCs show asymmetric inheritance of  
337 centrosomes and that disrupting retention of the pattern of centrosome inheritance  
338 affects proper neurogenesis in human forebrain organoids. Together with these proof  
339 of principle findings, the genetic approach we present here may become a powerful  
340 tool in elucidating the role centrosome inheritance plays in human disease and

341 cortical malformations. Indeed, the Centriolin-RITE tool kit presents a number of  
342 benefits over the previously described photoconversion-based approach (Wang et al.,  
343 2009). Photoconversion requires the tagged proteins to be targeted with a laser,  
344 which requires surgery or tissue extraction to allow for laser accessibility. This  
345 potentially alters the natural physiological processes within the tissues and may  
346 introduce experimental artefacts. Furthermore, photoconversion inevitably produces  
347 phototoxic events in cells which may alter their behavior. The Centriolin-RITE  
348 birthdating tool can be activated in a spatial and temporal dependent manner by the  
349 use of tamoxifen-inducible Cre approaches. This allows any tissues within an  
350 organism to be birthdated without having to physically disturb it. Additionally, we  
351 designed the RITE system to use fluorescent proteins tdTomato and NeonGreen that  
352 originate from two evolutionary distinct species: *Discosoma sp.*, and *Branchiostoma*  
353 *lanceolatum*, respectively (Shaner et al., 2004; Shaner et al., 2013). This facilitates  
354 biochemical separation of the birthdated proteins by immunoprecipitation; further, the  
355 addition of high-affinity biochemical tags to the RITE cassette is feasible and will  
356 allow for further biochemical and proteomics-based analyses, which are essential to  
357 untangling the complex protein-protein interactions in centrosomes (O'Neill et al.,  
358 2022). The data we present here show that asymmetric inheritance of centrosomes  
359 is an evolutionary conserved mechanism during cortical formation that may be of  
360 critical relevance for human brain development by maintaining the proper cellular  
361 behaviour of human neural progenitor cells.

362

363



364 **Methods**

365

366 *Genetic targeting and constructs*

367 Guide RNAs and CRISPR/Cas9 tagging was performed as described previously  
368 (Denoth-Lippuner et al., 2021). ENSEMBL ([www.ensembl.org](http://www.ensembl.org)) was used to find the  
369 full sequences of the gene of interest and the terminal stop codon. The Zhang group  
370 guide design tool ([www.crispr.mit.edu](http://www.crispr.mit.edu)) was used to find best gRNAs, based on the  
371 closeness to the stop codon and the lowest number of off-targets. Guides were  
372 synthesised from Microsynth AG, Switzerland and cloned into pSpCas9(BB)-2A-Puro  
373 (Addgene 48139) following the cloning strategy described by Ran *et al.* (Ran et al.,  
374 2013). The following gRNAs were used:

375 Human CNTRL: ACAAGACAGTATTCCTCATC

376 Human ER<sup>T2</sup>-Cre-ER<sup>T2</sup>: GGGGCCACTAGGGACAGGAT

377 To generate the homology arms required for the insertion of the construct via  
378 homologous-directed repair, an upstream and downstream region immediately  
379 adjacent to the terminal stop codon of the gene of interest was PCR amplified.

380 Primers used were:

381 Human CNTRL

382 Upstream homology Forward: GCCTCTTTAATGTGCCCAAG

383 Upstream homology Reverse: TCTGGCTGAGGCATTCTTTTC

384 Downstream homology Forward: TGAGGAATACTGTCTTGTGTAAATATATTC

385 Downstream homology Reverse: CTTGGTGGTGAGGGATGACT

386 Upon establishment of a cell line, genomic DNA was extracted using Qiagen DNeasy  
387 Blood & Tissue Kit (Qiagen 69504). Primers to test correct integration of the  
388 construct were designed such a way that one primer was within the inserted, non-  
389 native DNA and one was outside the inserted DNA including the homology arms.  
390 Additional primers were designed that would span the whole inserted region; these  
391 would test for homozygous vs heterozygous integration. PCRs were performed on  
392 WT and genetically modified genome DNA. CAG-Cre (Addgene No 13776) was used  
393 for recombination via electroporation. AAVS1-T2A-Puro\_CAG-ER<sup>T2</sup>-Cre-ER<sup>T2</sup> was  
394 cloned by replacing DR-GFP from pAAVS1-DR-GFP (Addgene No 113193) with  
395 ER<sup>T2</sup>-Cre-ER<sup>T2</sup> fragment was obtained from CAG-ER<sup>T2</sup>-Cre-ER<sup>T2</sup> (addgene 13777)  
396 via restriction digest. shRNAs were taken from broad institute database  
397 ([www.portals.broadinstitute.org/gpp/public/gene/search](http://www.portals.broadinstitute.org/gpp/public/gene/search)) and cloned into a retroviral  
398 backbone; viruses were produced as described before (Bin Imtiaz et al., 2021). Later,  
399 H2B-CFP was removed from the constructs and replaced with CRE-ER<sup>T2</sup> that was  
400 taken from CAG-ER<sup>T2</sup>-Cre-ER<sup>T2</sup> (Addgene 13777).

401

#### 402 *Human ESCs and organoids*

403 All hESC experiments were approved by the Kantonale Ethik-Kommission (KEK) of  
404 the canton of Zurich, Switzerland. H9 hESCs were maintained in feeder-free  
405 conditions and grown at 37°C with 5% CO<sub>2</sub> (Thomson et al., 1998). hESCs were fed  
406 with mTeSR1 or mTeSR plus (Stem Cell Technologies) in the absence of antibiotics  
407 and grown on hESC qualified Matrigel (Corning) coated plates. ReLeSR (Stem Cell  
408 Technologies) was used for routine passaging as it promotes stemness. Passaged  
409 cells were kept in media containing 10µM Y-27632 (Stem Cell Technologies) for 24  
410 hours to promote survival. Some protocols required a single cell suspension of

411 hESCs (e.g., electroporations, aggrewwells); to obtain a single cell suspension,  
412 hESCs were instead passaged with Accutase (Sigma-Aldrich). For freezing down,  
413 hESCs were resuspended in CryoStore CS10 (Sigma-Aldrich) and stored below -  
414 170°C in liquid nitrogen. For electroporations, hESC were maintained in media  
415 containing Y-27632 for at least 1 hour to improve cell survival. Approximately two  
416 million cells were used per electroporation. Chilled Nucleofector V (Lonza) was used  
417 as the electroporation medium, and the electroporation was performed on the  
418 AMAXA electroporation system using the programme A-23. For overexpression, 1µg  
419 of DNA per plasmid was electroporated. For gene editing, 4µg of DNA per plasmid  
420 was electroporated. Recombination of Cre-ER<sup>T2</sup> expressing cells was induced in  
421 ER<sup>T2</sup>-Cre-ER<sup>T2</sup> expressing cells by administration of 0.5µM 4-hydroxytamoxifen  
422 (Sigma-Aldrich) for 24 hours. Neomycin resistant cells were selected with 100µg/ml  
423 G418 sulfate (Gibco). Puromycin resistant cells were selected with 1µg/ml puromycin  
424 (Gibco).

425 The human forebrain organoid protocol was described before (Qian et al., 2016;  
426 Qian et al., 2018). We used a modified form of this protocol, and the adjustments are  
427 as follows.

428 *Day 0, maintenance of hESC and EB formation.* hESCs were cultured in feeder free  
429 conditions. To produce EBs on day 0 a single cell suspension was acquired with the  
430 use of Accutase. hESCs were incubated with 10µM Y-27632 at least 1 hour prior to  
431 passaging to promote survival. The number of cells in the suspension was estimated  
432 with use of a cytometer and appropriate volume of suspension was added to  
433 AggreWell 800 (Stem Cell Technologies) that would result in 5000 cells per  
434 microwell being produced. AggreWells were pre-treated with Anti-adherence Rinsing

435 Solution (Stem Cell Technologies) and AggreWell plates were centrifuged following  
436 the manufacturer's guidelines.

437 *Day 1-4, Harvesting EBs and maintenance of EBs.* On day 1 EBs are harvested  
438 following the AggreWell manufacturer's guide by gently pipetting with either a 5ml  
439 pipette or a 1ml pipette with the tip cut off. Prior to harvesting, medium was ran the  
440 full length of the pipette to reduce the adherence of EBs to the side of the pipette.  
441 EBs were transferred to a 6 well Ultra-Low Attachment Plate (Corning) or a 10cm  
442 Ultra-Low Attachment Plate (Corning) and maintained in mTeSR-E5 (Stem Cell  
443 Technologies) with 2 $\mu$ M Dorsomorphin (Sigma-Aldrich) and 2 $\mu$ M A83-01 (Tocris)  
444 until day 4. Media was changed day 3 and 4.

445 *Day 5-14, Adaption and maintenance in Induction media.* Days 5 to 14 follow the  
446 exact same steps as described in Qian et al. 2018, but with a different media. The  
447 induction media used was mTeSR-E5 with 1 $\mu$ M CHIR99021 (Stem Cell  
448 Technologies) and 1 $\mu$ M SB-431542 (Stem Cell Technologies).

449

#### 450 *Imaging and immunostaining*

451 hESCs were fixed by either incubation with prewarmed 4% paraformaldehyde  
452 (Sigma-Aldrich) for 15 minutes at room temperature or with chilled methanol (Sigma-  
453 Aldrich) for 20 minutes at 4 $\square$ . All monolayer immunostainings used 3% Donkey  
454 Serum (Millipore) as a blocking agent and 0.25% Triton-X (Sigma-Aldrich) as a  
455 permeabilization agent. Primary antibodies were incubated with the samples at 4 $\square$   
456 overnight and secondary antibodies were incubated for 1 hour and 30 minutes at  
457 room temperature. Zeiss LSM 800 confocal microscope was used to obtain all  
458 images. For live cell imaging, hESCs were maintained at 37 $\square$  and with 5% CO<sub>2</sub>

459 facilitated by the incubator chamber and heated stage that is fitted to the microscope.  
460 hESCs were imaged in Matrigel coated Lab Tek II chambered cover glasses  
461 (Thermo Fisher Scientific). For imaging following electroporation, cells were plated  
462 on the Lab Tek cover glasses. Imaging started after at least 6 hours. For imaging  
463 involving ER<sup>T2</sup>-Cre-ER<sup>T2</sup>expressing cells, hESCs were first plated on Lab Tek  
464 chambered coverglasses (Thermos Fisher Scientific) and allowed to settle for at  
465 least 24 hours. Recombination was induced *in situ* with the addition of 0.5µM 4-  
466 hydroxytamoxifen (Sigma-Aldrich) into the media. hESCs were imaged every hour.  
467 Throughout imaging hESCs were maintained in mTeSR plus containing 10µM Y-  
468 27632 and Penicillin-Streptomycin-Amphotericin B (Anti-Anti, Thermo Fisher  
469 Scientific). Additionally, media was supplemented with 1:1000 SiR-DNA  
470 (Spirochrome), in the absence of Verapamil, to visualise the nucleus and facilitate  
471 easier tracking of cells. Media was changed every 24 hours.

472 Organoids were electroporated as described (Denoth-Lippuner et al., 2021;  
473 Denoth-Lippuner et al., 2022). Recombination was induced in ER<sup>T2</sup>-Cre-  
474 ER<sup>T2</sup>expressing organoids by administration of 10µM 4-hydroxytamoxifen (Sigma-  
475 Aldrich) for 48 hours. Organoids were fixed with prewarmed 4% paraformaldehyde  
476 (Sigma-Aldrich) for 15 minutes at room temperature. Fixed organoids were  
477 suspended in 30% sucrose overnight at 4 °C; organoids were maintained in 30%  
478 sucrose until sectioned. For sectioning, organoids were embedded in OCT  
479 compound (Tissue-Tek) and frozen solid. 20-40µm sections were sectioned using a  
480 cryostat and adhered to cover slides. Sections were kept at -20°C until stained. For  
481 tissues containing fluorophores, proper measures were undertaken to prevent  
482 unnecessary and extensive exposure to light during the whole process. All organoid  
483 immunostainings used 10% Donkey Serum (Millipore) as a blocking agent and 0.5%

484 Triton-X (Sigma-Aldrich) as a permeabilization agent. Primary antibodies were  
485 incubated with the samples at 4°C for 1-3 nights and secondary antibodies were  
486 incubated for 1 hour and 30 minutes at room temperature. The signal of H2B-CFP  
487 electroporated organoids was amplified using an anti-GFP antibody.

488

#### 489 *Image analysis*

490 All images were analysed using ImageJ/Fiji and the data was processed and  
491 analysed in Excel or R. For organoid analysis, images with ventricular recombined  
492 centrosomes were selected. The thickness of the ventricle was measured using the  
493 SOX2 staining as the outer boundary. A circle with a radius of a maximum of 3 times  
494 the ventricle thickness or to the edge of the tissue (which ever was less), centred on  
495 the ventricle midpoint was cropped out. The centre of the ventricle was cropped out  
496 leaving a ring of 3-5 centrosomes, care was taken not to crop out recombined  
497 centrosomes that were part of the same cluster. A line was drawn between the two  
498 ends of the cluster. A perpendicular line was drawn in the middle of the line extending  
499 radially out of the ventricular zone to the edge of the circle. Two more lines were  
500 drawn from the ends of the first line at an angle of 45° extending to the edge of the  
501 circle. The area within these 3 lines and the arc of the edge of the circle was cropped  
502 out and analysed.

503 Recombined centrosomes were manually assigned one of three colours,  
504 orange, yellow or green. The criteria for each were as follows and were dependent  
505 on the unrecombined centrosomes in the same image. Orange centrosomes were  
506 centrosomes with both tdTomato and NeonGreen signal, and where the tdTomato  
507 signal was similar to that of unrecombined centrosomes. Yellow centrosomes had

508 both tdTomato and NeonGreen signal, but the tdTomato signal was visibly less than  
509 unrecombined centrosomes. Green centrosomes had only NeonGreen signal; the  
510 tdTomato signal in these centrosomes was undetectable by eye. The ventricular  
511 centrosomes (vent) and non-ventricular centrosomes (nonvent) were counted by  
512 colour for each image. Ratios of each colour were calculated and compared between  
513 different images. The absolute counts of centrosomes by colour were calculated  
514 across images and compared by their region. Additionally, the ratio of counts  
515 between regions was calculated for each colour.

516 Centrosomes were analysed in two groups: centrosomes from the ventricle  
517 (vent) and centrosomes outside the ventricle (nonvent). Vent centrosomes were  
518 defined as the centrosomes visibly localised on the ventricular wall, identifiable by  
519 the high density of centrosomes in a circular configuration. Nonvent centrosomes  
520 were centrosomes localised outside of the ventricular wall. Centrosomes were drawn  
521 around and the mean signal intensity was recorded for tdTomato and NeonGreen.  
522 The ratio of NeonGreen to total signal was calculated by dividing the NeonGreen by  
523 the sum of tdTomato and NeonGreen signal. Means of this ratio were calculate for  
524 each region of each image. This ratio was used for the digital allocation of orange,  
525 yellow and green, with the centrosomes in the top third for highest ratio being  
526 assigned green, the second third yellow and the lowest ratio centrosomes being  
527 assigned orange.

528 Used antibodies:

| Antibody | Species | Manufacturer | Catalogue No. / RRID     | Dilution |
|----------|---------|--------------|--------------------------|----------|
| PCNT     | Rabbit  | Abcam        | ab4448<br>RRID:AB_304461 | 1:1000   |

|                 |         |            |                               |        |
|-----------------|---------|------------|-------------------------------|--------|
| <b>SOX2</b>     | Rabbit  | Millipore  | AB5603<br>RRID:AB_2286686     | 1:200  |
| <b>SOX2</b>     | Mouse   | R&D        | MAB2018<br>RRID:AB_358009     | 1:200  |
| <b>CTIP2</b>    | Rat     | Abcam      | ab18465<br>RRID:AB_2064130    | 1:200  |
| <b>CEP164</b>   | Rabbit  | Abcam      | ab221447 / n.a.               | 1:200  |
| <b>tdTomato</b> | Goat    | Origene    | AB8181-200 / n.a.             | 1:750  |
| <b>Ninein</b>   | Mouse   | Santa Cruz | sc-376420<br>RRID:AB_11151570 | 1:250  |
| <b>GFP</b>      | Chicken | Aves       | GFP.1020<br>RRID:AB_10000240  | 1:1000 |

529

### 530 *Statistical analysis*

531 Statistical significance of all data presented here was tested by using unpaired,  
532 students T-test. Significance is represented with asterisks and ns, which correspond  
533 to the following  $p$  values: ns =  $p > 0.05$ , \* =  $p < 0.05$ , \*\* =  $p < 0.01$ , \*\*\* =  $p < 0.001$ .  
534 The number of analysed data for the control and the test condition were kept the  
535 same. The number of analysed data represented in the figure legend as n, where n  
536 is equal to the number of control or test data points.

### 537 **Funding Information**

538 This work was supported by the European Research Council (STEMBAR to S.J.),  
539 the Swiss National Science Foundation (BSCGI0\_157859 and  
540 310030\_196869 to S.J.), the Boehringer Ingelheim Fonds (to L.N.R), and the Zurich  
541 Neuroscience Center. Fundings sources were not involved in study design, data  
542 collection and interpretation, or decision to submit the work for publication.

543

### 544 **Acknowledgements**



545 We thank Y. Barral for critical conceptual input.

546

547 **Declaration of interests**

548 The authors declare no competing interests.

549

## 550 **References**

- 551 Arquint C, Gabryjonczyk A-M, Nigg EA (2014) Centrosomes as signalling centres.  
552 Philosophical transactions of the Royal Society of London Series B, Biological  
553 sciences 369.
- 554 Bin Imtiaz MK, Jaeger BN, Bottes S, Machado RAC, Vidmar M, Moore DL,  
555 Jessberger S (2021) Declining lamin B1 expression mediates age-dependent  
556 decreases of hippocampal stem cell activity. *Cell Stem Cell*.
- 557 Bornens M (2002) Centrosome composition and microtubule anchoring mechanisms.  
558 *Current opinion in cell biology* 14:25-34.
- 559 Cadwell CR, Bhaduri A, Mostajo-Radji MA, Keefe MG, Nowakowski TJ (2019)  
560 Development and Arealization of the Cerebral Cortex. *Neuron* 103:980-1004.
- 561 Camargo Ortega G et al. (2019) The centrosome protein AKNA regulates  
562 neurogenesis via microtubule organization. *Nature* 567:113-117.
- 563 Chong WM, Wang W-J, Lo C-H, Chiu T-Y, Chang T-J, Liu Y-P, Tanos B, Mazo G,  
564 Tsou M-FB, Jane W-N, Yang TT, Liao J-C (2020) Super-resolution  
565 microscopy reveals coupling between mammalian centriole subdistal  
566 appendages and distal appendages. *Elife* 9.
- 567 Denoth-Lippuner A, Royall LN, Gonzalez-Bohorquez D, Machado D, Jessberger S  
568 (2022) Injection and electroporation of plasmid DNA into human cortical  
569 organoids. *STAR Protocols* 3:101129.
- 570 Denoth-Lippuner A, Jaeger BN, Liang T, Royall LN, Chie SE, Buthey K, Machado D,  
571 Korobeynyk VI, Kruse M, Munz CM, Gerbaulet A, Simons BD, Jessberger S  
572 (2021) Visualization of individual cell division history in complex tissues using  
573 iCOUNT. *Cell Stem Cell* 28:2020-2034 e2012.
- 574 Di Lullo E, Kriegstein AR (2017) The use of brain organoids to investigate neural  
575 development and disease. *Nature reviews* 18:573-584.
- 576 Faheem M, Naseer MI, Rasool M, Chaudhary AG, Kumosani TA, Ilyas AM,  
577 Pushparaj P, Ahmed F, Algahtani HA, Al-Qahtani MH, Saleh Jamal H (2015)  
578 Molecular genetics of human primary microcephaly: an overview. *BMC*  
579 *medical genomics* 8 Suppl 1:S4.
- 580 Gao P, Postiglione MP, Krieger TG, Hernandez L, Wang C, Han Z, Streicher C,  
581 Papusheva E, Insolera R, Chugh K, Kodish O, Huang K, Simons BD, Luo L,

- 582 Hippenmeyer S, Shi SH (2014) Deterministic progenitor behavior and unitary  
583 production of neurons in the neocortex. *Cell* 159:775-788.
- 584 Gromley A, Jurczyk A, Sillibourne J, Halilovic E, Mogensen M, Groisman I, Blomberg  
585 M, Doxsey S (2003) A novel human protein of the maternal centriole is  
586 required for the final stages of cytokinesis and entry into S phase. *The Journal*  
587 *of cell biology* 161:535-545.
- 588 Gromley A, Yeaman C, Rosa J, Redick S, Chen C-T, Mirabelle S, Guha M,  
589 Sillibourne J, Doxsey SJ (2005) Centriolin anchoring of exocyst and SNARE  
590 complexes at the midbody is required for secretory-vesicle-mediated  
591 abscission. *Cell* 123:75-87.
- 592 Hansen DV, Lui JH, Parker PR, Kriegstein AR (2010) Neurogenic radial glia in the  
593 outer subventricular zone of human neocortex. *Nature* 464:554-561.
- 594 Hotz M, Leisner C, Chen D, Manatschal C, Wegleiter T, Ouellet J, Lindstrom D,  
595 Gottschling DE, Vogel J, Barral Y (2012) Spindle pole bodies exploit the  
596 mitotic exit network in metaphase to drive their age-dependent segregation.  
597 *Cell* 148:958-972.
- 598 Januschke J, Llamazares S, Reina J, Gonzalez C (2011) *Drosophila* neuroblasts  
599 retain the daughter centrosome. *Nat Commun* 2:243.
- 600 Kashihara H, Chiba S, Kanno Si, Suzuki K, Yano T, Tsukita S (2019) Cep128  
601 associates with Odf2 to form the subdistal appendage of the centriole. *Genes*  
602 *to Cells* 24:231-243.
- 603 Kasioulis I, Das RM, Storey KG (2017) Inter-dependent apical microtubule and actin  
604 dynamics orchestrate centrosome retention and neuronal delamination. *Elife* 6.
- 605 Lancaster MA, Renner M, Martin CA, Wenzel D, Bicknell LS, Hurles ME, Homfray T,  
606 Penninger JM, Jackson AP, Knoblich JA (2013) Cerebral organoids model  
607 human brain development and microcephaly. *Nature* 501:373-379.
- 608 Lengefeld J, Hotz M, Rollins M, Baetz K, Barral Y (2017) Budding yeast Wee1  
609 distinguishes spindle pole bodies to guide their pattern of age-dependent  
610 segregation. *Nature cell biology* 19:941-951.
- 611 Libe-Philippot B, Vanderhaeghen P (2021) Cellular and Molecular Mechanisms  
612 Linking Human Cortical Development and Evolution. *Annu Rev Genet* 55:555-  
613 581.
- 614 Llinares-Benadero C, Borrell V (2019) Deconstructing cortical folding: genetic,  
615 cellular and mechanical determinants. *Nature reviews* 20:161-176.

- 616 Noctor SC, Martinez-Cerdeno V, Ivic L, Kriegstein AR (2004) Cortical neurons arise  
617 in symmetric and asymmetric division zones and migrate through specific  
618 phases. *Nat Neurosci* 7:136-144.
- 619 O'Neill AC et al. (2022) Spatial centrosome proteome of human neural cells  
620 uncovers disease-relevant heterogeneity. *Science* (New York, NY  
621 376:eabf9088.
- 622 Ostrem B, Di Lullo E, Kriegstein A (2017) oRGs and mitotic somal translocation - a  
623 role in development and disease. *Current opinion in neurobiology* 42:61-67.
- 624 Paridaen JTML, Wilsch-Bräuninger M, Huttner WB (2013) Asymmetric Inheritance of  
625 Centrosome-Associated Primary Cilium Membrane Directs Ciliogenesis after  
626 Cell Division. *Cell* 155:333-344.
- 627 Pereira G, Tanaka TU, Nasmyth K, Schiebel E (2001) Modes of spindle pole body  
628 inheritance and segregation of the Bfa1p-Bub2p checkpoint protein complex.  
629 *The EMBO journal* 20:6359-6370.
- 630 Qian X, Jacob F, Song MM, Nguyen HN, Song H, Ming GL (2018) Generation of  
631 human brain region-specific organoids using a miniaturized spinning  
632 bioreactor. *Nature protocols* 13:565-580.
- 633 Qian X et al. (2016) Brain-Region-Specific Organoids Using Mini-bioreactors for  
634 Modeling ZIKV Exposure. *Cell* 165:1238-1254.
- 635 Ran FA, Hsu PD, Wright J, Agarwala V, Scott DA, Zhang F (2013) Genome  
636 engineering using the CRISPR-Cas9 system. *Nature protocols* 8:2281-2308.
- 637 Ranjan R, Snedeker J, Chen X (2019) Asymmetric Centromeres Differentially  
638 Coordinate with Mitotic Machinery to Ensure Biased Sister Chromatid  
639 Segregation in Germline Stem Cells. *Cell Stem Cell* 25:666-681 e665.
- 640 Roemer EJ, West, Kesley L., Northrup, Jessica B., Iverson, Jana, M. (2016) 乳鼠心  
641 肌提取 HHS Public Access. *Physiology & behavior* 176:139-148.
- 642 Royall LN, Jessberger S (2021) How stem cells remember their past. *Current opinion*  
643 *in cell biology* 69:17-22.
- 644 Shaner NC, Campbell RE, Steinbach PA, Giepmans BNG, Palmer AE, Tsien RY  
645 (2004) Improved monomeric red, orange and yellow fluorescent proteins  
646 derived from *Discosoma* sp. red fluorescent protein. *Nature biotechnology*  
647 22:1567-1572.

- 648 Shaner NC, Lambert GG, Chammas A, Ni Y, Cranfill PJ, Baird MA, Sell BR, Allen JR,  
649 Day RN, Israelsson M, Davidson MW, Wang J (2013) A bright monomeric  
650 green fluorescent protein derived from *Branchiostoma lanceolatum*. *Nature*  
651 *methods* 10:407-409.
- 652 Shao W, Yang J, He M, Yu X-Y, Lee CH, Yang Z, Joyner AL, Anderson KV, Zhang J,  
653 Tsou M-FB, Shi H, Shi S-H (2020) Centrosome anchoring regulates  
654 progenitor properties and cortical formation. *Nature* 580:106-112.
- 655 Sunchu B, Cabernard C (2020) Principles and mechanisms of asymmetric cell  
656 division. *Development (Cambridge, England)* 147.
- 657 Thomson JA, Itskovitz-Eldor J, Shapiro SS, Waknitz MA, Swiergiel JJ, Marshall VS,  
658 Jones JM (1998) Embryonic stem cell lines derived from human blastocysts.  
659 *Science (New York, NY)* 282:1145-1147.
- 660 Tozer S, Baek C, Fischer E, Gojame R, Morin X (2017) Differential Routing of  
661 Mindbomb1 via Centriolar Satellites Regulates Asymmetric Divisions of  
662 Neural Progenitors. *Neuron* 93:542-551.e544.
- 663 Wang X, Tsai JW, Imai JH, Lian WN, Vallee RB, Shi SH (2009) Asymmetric  
664 centrosome inheritance maintains neural progenitors in the neocortex. *Nature*  
665 461:947-955.
- 666
- 667

668 **Figures**

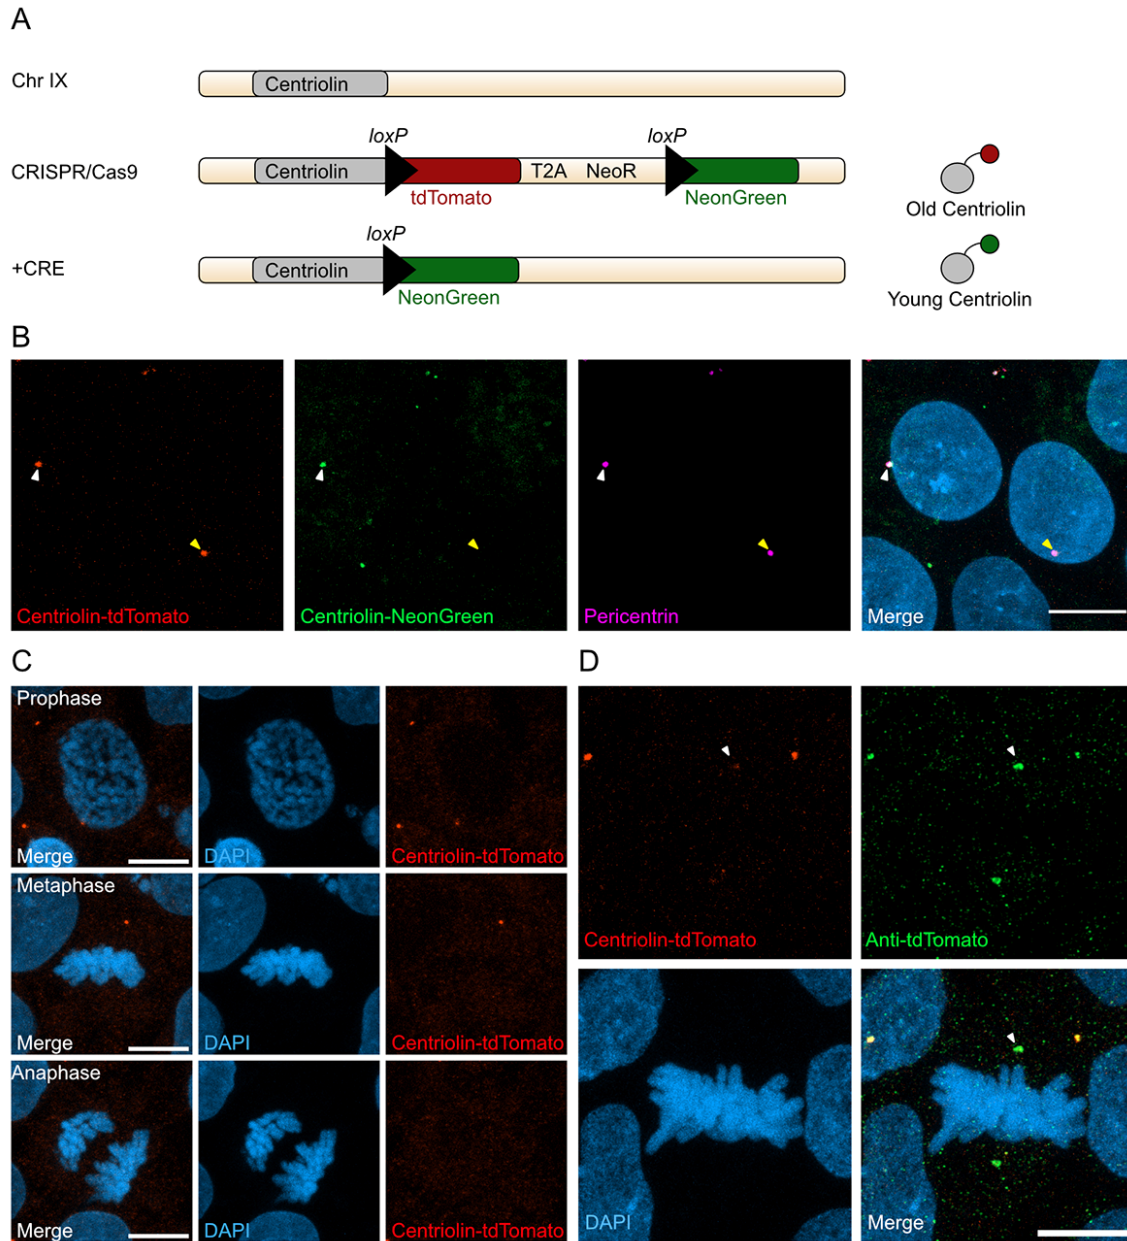

669

670 **Figure 1.** RITE-based birthdating of centrosomes. (A) Centriolin is tagged with the  
671 RITE system in hESCs so that all Centriolin protein made is tdTomato-tagged. Upon  
672 recombination with Cre recombinase, the tdTomato fluorophore is replaced with  
673 NeonGreen, making all new Centriolin protein tagged with NeonGreen. Identifying a  
674 proteins tag will indicate the proteins age with tdTomato being the oldest, then

675 NeonGreen. (B) Image of hESCs expressing Centriolin-RITE 24h post Cre induction.  
676 Arrowheads point to Pericentrin-positive centrosomes where the Centriolin protein  
677 localises to. The yellow arrowhead shows a centrosome that has not recombined,  
678 whereas one depicted by the white arrowhead has recombined as indicated by the  
679 appearance of NeonGreen signal. Scale bars, 10 $\mu$ m (C) Signal of Centriolin through  
680 mitosis. In prophase centriolin signal is present, however the signal disappears in  
681 metaphase and anaphase. Scale bars, 10 $\mu$ m (D) Staining for tdTomato protein  
682 shows that Centriolin-tdTomato is present at the centrosome during metaphase but  
683 that the signal is subsequently quenched. Scale bars, 10 $\mu$ m.

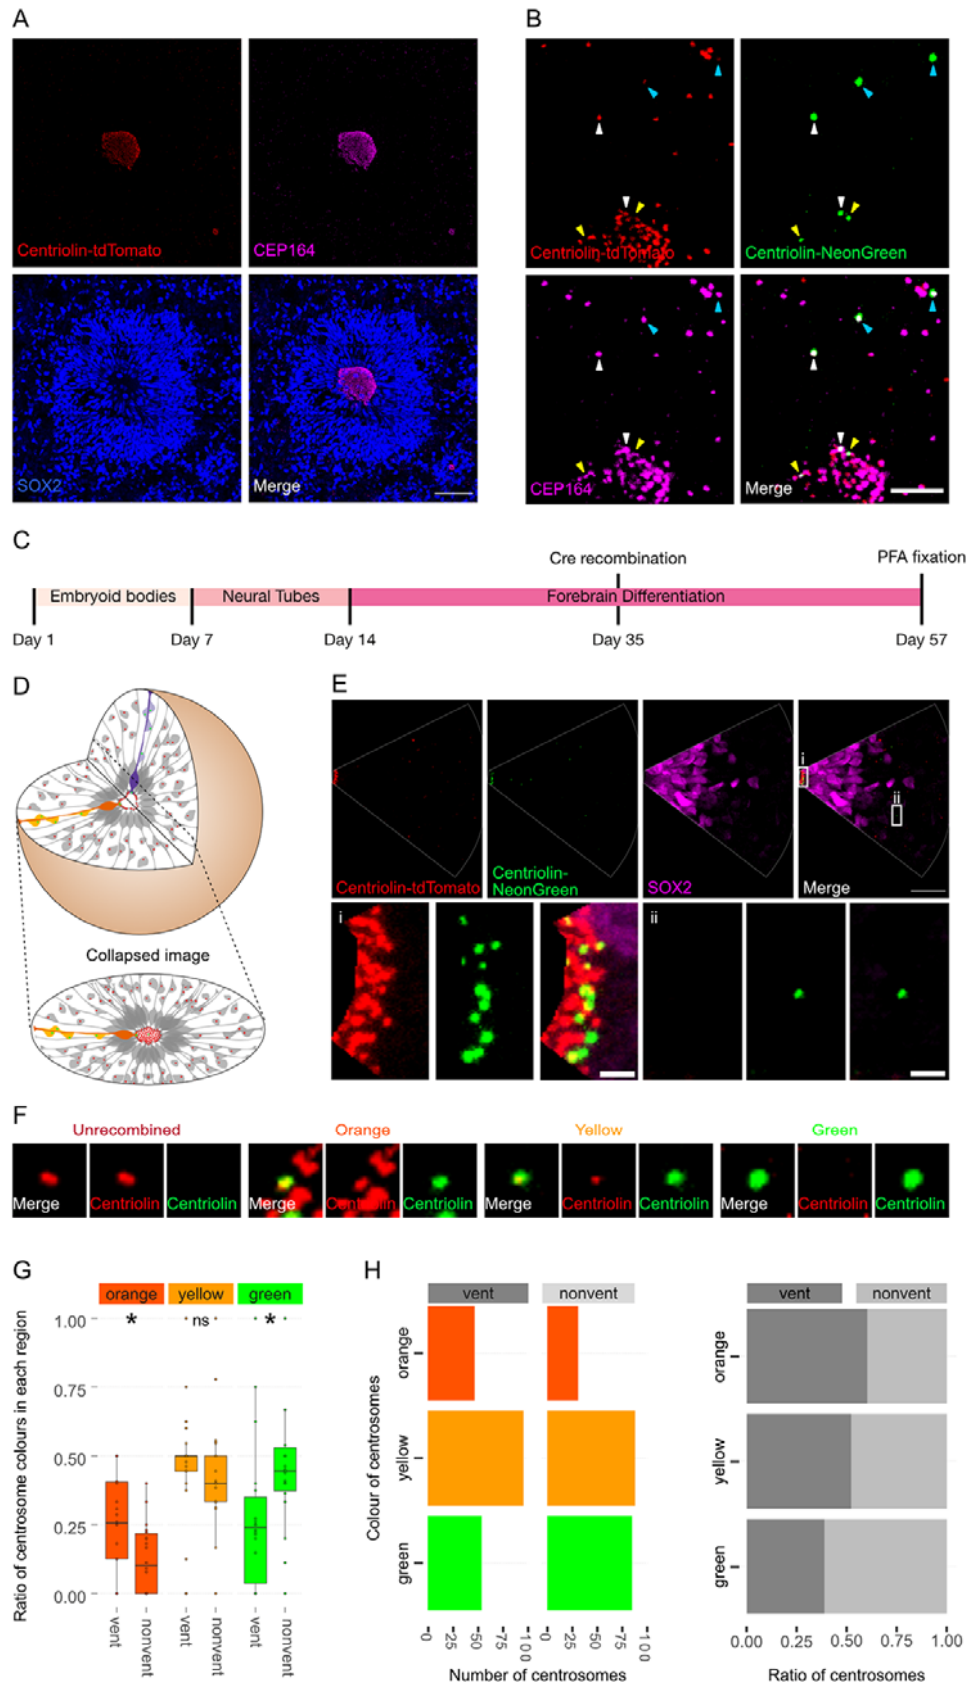

684



685 **Figure 2.** Asymmetric inheritance of centrosomes in human forebrain organoids. (A)  
686 Cortical unit of a day 35 forebrain organoid. The ventricular zone is easily identified  
687 by densely packed SOX2-positive NPCs that form a rosette-like structure around the  
688 ventricular centrosomes, shown by Centriolin-tdTomato and the mother centriole  
689 marker CEP164. Scale bar, 50 $\mu$ m. (B) Recombined centrosomes exhibiting variable  
690 quantities of the older, Centriolin-tdTomato protein. Arrowheads indicate recombined  
691 centrosomes identifiable by the presence of Centriolin-NeonGreen. White  
692 arrowheads show centrosomes that have a large quantity of Centriolin-tdTomato  
693 present, thus are the oldest. Blue arrowhead indicated centrosomes have visibly less  
694 Centriolin-tdTomato, and the yellow arrowhead-depicted have no visible tdTomato  
695 signal, suggesting these are the most recently formed centrosomes. Scale bar, 5 $\mu$ m.  
696 (C) Scheme showing the timing of Cre recombination in the context of the organoid  
697 protocol. (D) Schematic showing how imaging organoid sections causes the loss of  
698 progeny of some NPCs. In this example, two NPCs have recombined (orange and  
699 purple) and have produced progeny of a similar colour that migrate away along their  
700 radial processes. When imaging sections that include a ventricle, both the orange  
701 and purple NPCs' centrosomes are included in the image. The orange progeny are  
702 also included because they migrate away along the x/y axis of the image. However,  
703 as the purple NPCs' progeny will migrate away along the z-axis, they are not imaged.  
704 (E) Example of an analysed image. The ventricular centrosomes are shown in large  
705 in (i) and an example of non-ventricular centrosome is shown in (ii). Scale bars,  
706 upper panel 20 $\mu$ m, (i - ii) 2 $\mu$ m. (F) Representative images that display the criteria of  
707 manual colour allocation. Recombined centrosomes signal was compared to  
708 unrecombined centrosomes. Centrosomes whose tdTomato signal was  
709 indistinguishable from unrecombined were allocated orange, those that had less

710 tdTomato than unrecombined were yellow and those that had no tdTomato signal  
711 were green. Due to the presence of tdTomato signal, orange centrosomes would be  
712 the oldest, yellow the second oldest and green the youngest. (G-H) Analysis of the  
713 manual colour calling shows a significant enrichment of orange centrosomes in  
714 ventricle and a significant enrichment of green centrosomes outside of the ventricle  
715 (n = 22, cortical units). ns, non-significant, \* $p < 0.05$

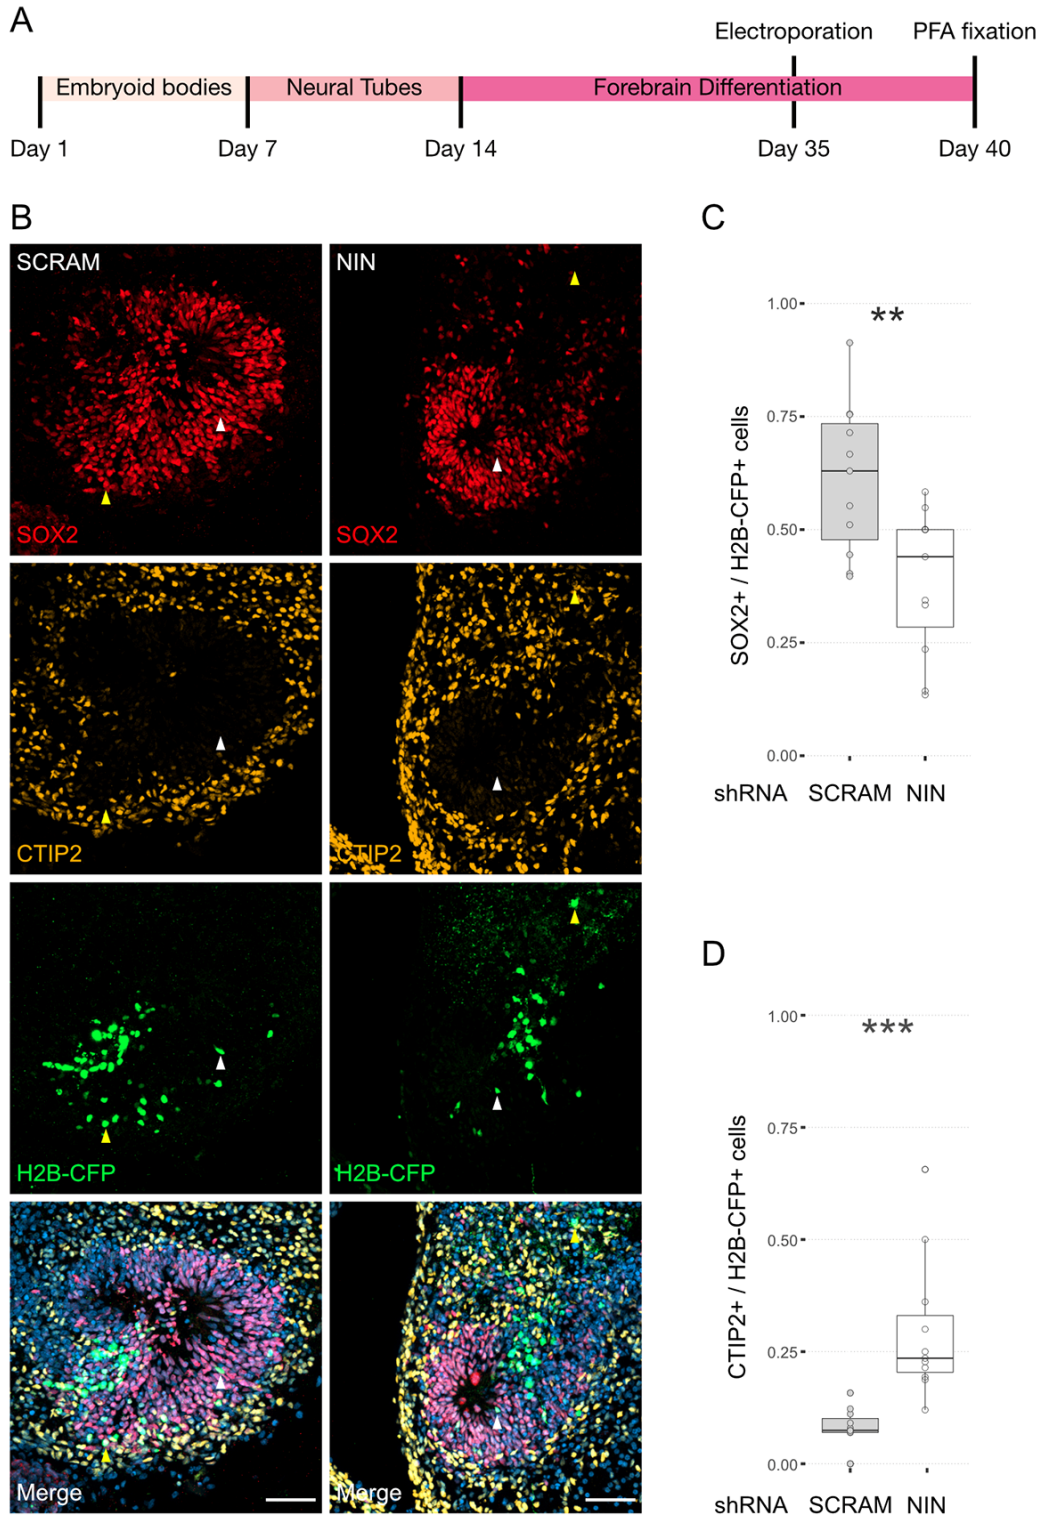

716

717 **Figure 3.** Randomisation of centrosome inheritance affects NPC fate. (A) Scheme  
718 showing the timing of electroporation of the shRNA construct in the context of the

719 organoid protocol. (B) Day 40 WT organoids, 5 days post electroporation with either  
720 scrambled shRNA or NIN-targeting shRNA, and a H2B-CFP marker. Scale bars,  
721 50 $\mu$ m. (C) Graph of the ratio of SOX2-positive nuclei to H2B-CFP nuclei (n = 11,  
722 cortical units). (D) Graph of the ratio of CTIP2-positive nuclei to H2B-CFP nuclei (n =  
723 11, cortical units). \*\* $p < 0.01$ , \*\*\* $p < 0.001$

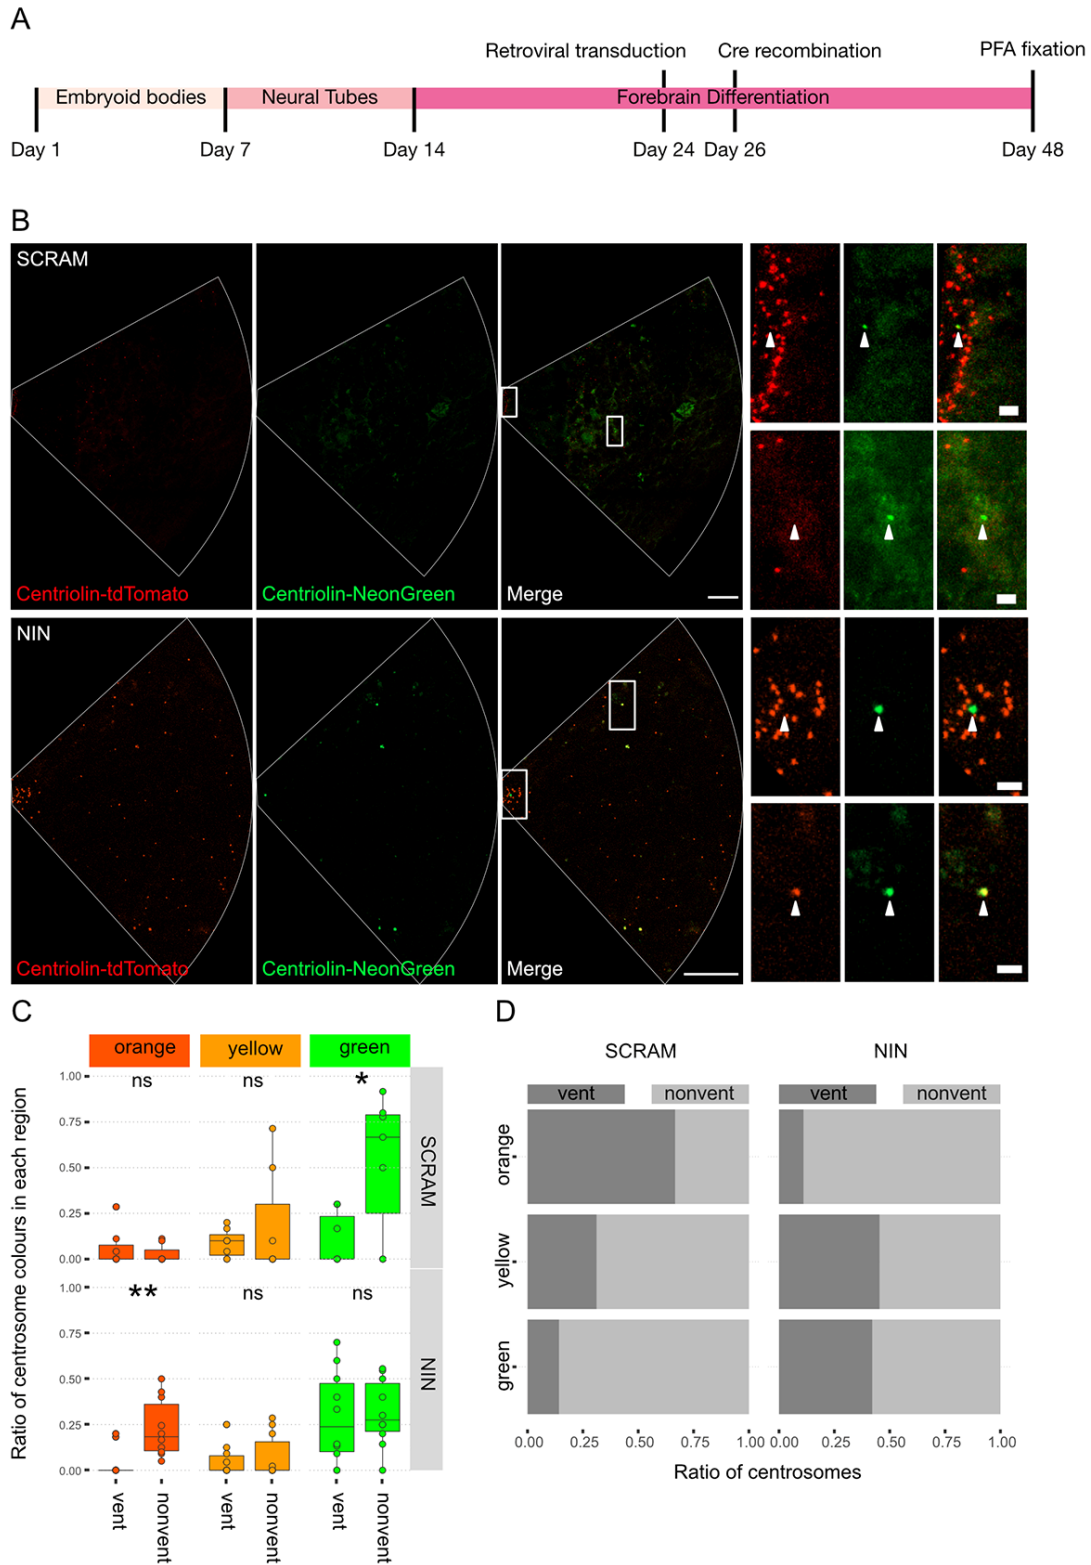

724

725 **Figure 4.** Ninein-shRNA alters retention of the older centrosome in the ventricular  
 726 zone. (A) Timing of the retroviral transduction and subsequent recombination in the

727 context of the organoid protocol. (B) Day 24 Centriolin-RITE organoids were infected  
728 with retroviral expression of scrambled or NIN-targeting shRNA, and Cre-ERT2.  
729 Organoids were fixed 22 days after recombination was induced with tamoxifen.  
730 Scale bars, 25 $\mu$ m (left column), 2 $\mu$ m (right column). (C) Comparison of the colour of  
731 centrosomes in each region by shRNA treatment using manual colour calling (scram  
732 n = 7, nin = 10 N, cortical units; note that single unit data overlay for “vent” data  
733 points). (D) Analysis of the colour composition of each region shows a shift in  
734 localisation of the older centrosomes to the nonvent region for the NIN shRNA  
735 treated organoids (n = 8, cortical units). ns, non-significant, \* $p < 0.05$ , \*\* $p < 0.01$

736

737 **Supplementary figures**

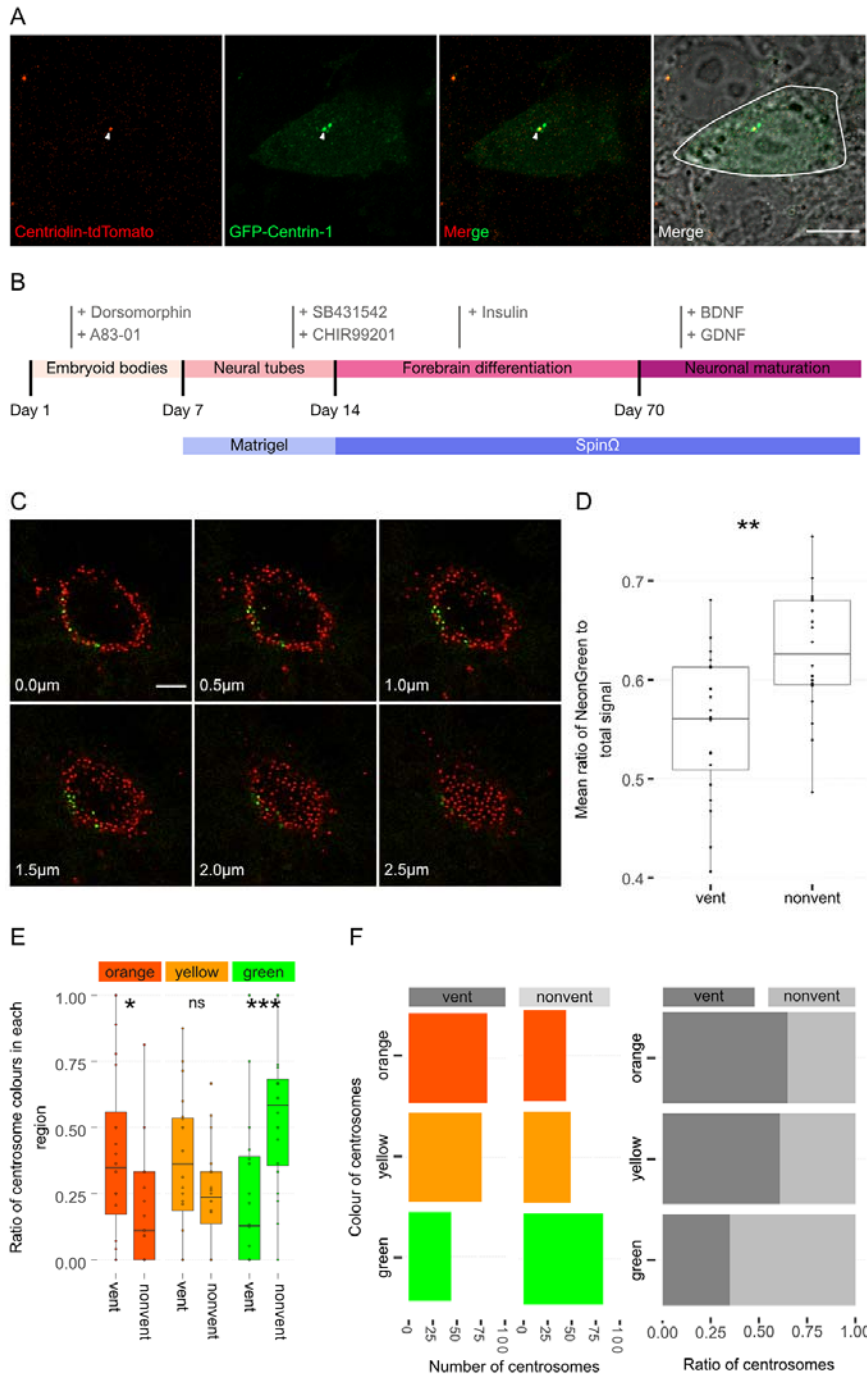

738

739 **Supplementary Figure 1.** Centrosome analyses in organoids. (A) hESC  
 740 electroporated with GFP-Centrin-1 is outlined in white. Centriolin localises to only  
 741 one of the two centrioles marked by GFP-Centrin-1. Scale bars, 10µm. (B) Scheme

742 showing a timeline of forebrain organoid protocol, with the small molecules used  
743 during each part of the protocol. (C) Cross-sections of a ventricle show its 3-  
744 dimensional, tubular/ spherical structure. Centrosomes are identified by their  
745 endogenous Centriolin-tdTomato/Centriolin-NeonGreen signal. (D) Boxplot of mean  
746 ratio of NeonGreen to total signal for each region, shows non-ventricular  
747 centrosomes are significantly greener than the ventricular centrosomes (n = 20,  
748 cortical units). (E-F) Automated colour calling from the ratio of NeonGreen to total  
749 signal, this supports the manual data showing a significant enrichment of old  
750 centrosomes in the ventricle (n = 20, cortical units). ns, non-significant, \* $p < 0.05$ , \*\* $p$   
751  $< 0.01$ , \*\*\* $p < 0.001$

752



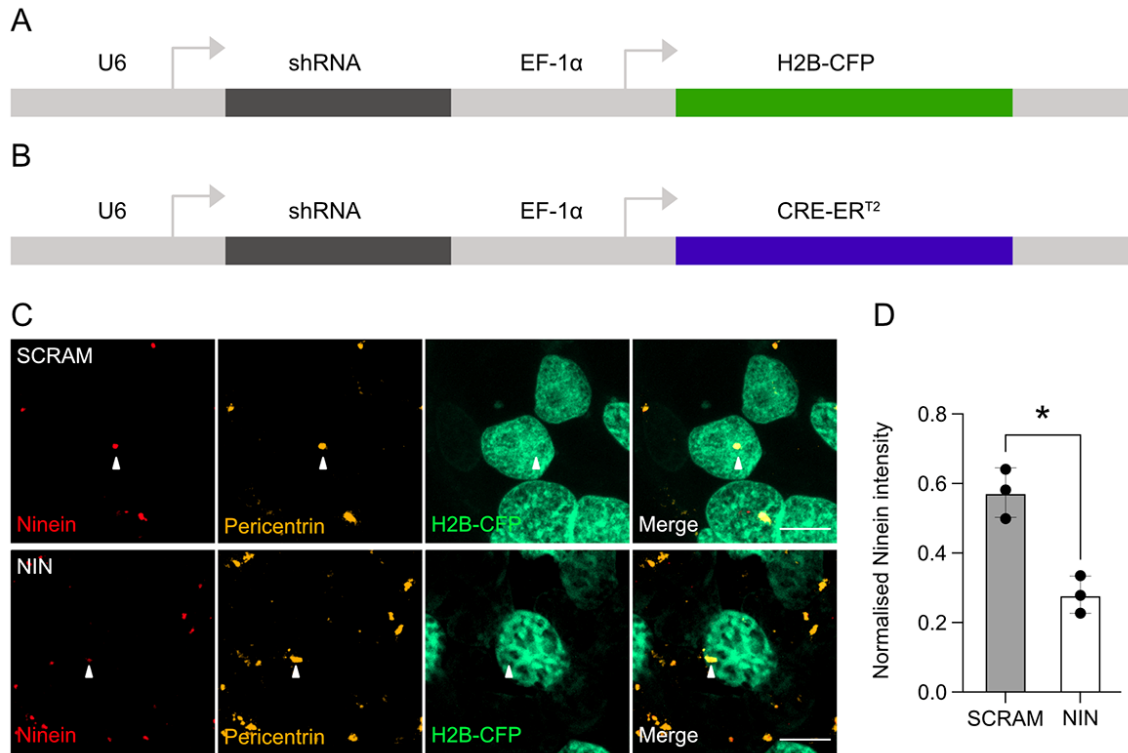

753

754 **Supplementary Figure 2.** Ninein knockdown in human cells. (A) Genetic map of the  
755 constructs used for the electroporation experiments. shRNA is expressed through  
756 the U6 promoter and the H2B-CFP is expressed via the EF-1 $\alpha$  promoter. (B) Genetic  
757 map of the construct used for the generation of retroviruses. shRNA is expressed  
758 through the U6 promoter and the CRE-ER<sup>T2</sup> is expressed via the EF-1 $\alpha$  promoter.  
759 (C) Example images of the effect of transfection of the shRNAs targeting Ninein (NIN  
760 KD) and control shRNA (SCRAM) on Ninein expression in HEK cells. Scale bars,  
761 10 $\mu$ m. (D) Graph of the mean Ninein signal of each replicate, corrected for  
762 background and normalised to the maximum centrosome signal within each replicate  
763 (n = 3, replicates; each replicate consisting of 5 images). \**p* < 0.05

764

765
